# Supplementary material
Source: Springer Nature journal article supplement (https://www.springermedizin.de/resource/supplementary/12889_2013_5876_MOESM1_ESM.pdf/9496412)
Supplement: MOESM1 [file 9496412]

Table S1 2006 National immunization programme recommendations

| <b>Vaccine</b> | <b>Age of vaccination and doses</b>                        |
|----------------|------------------------------------------------------------|
| DTP/DTaP       | 5 doses at 2, 4, 6, 15–18 months, 4–6 years                |
| IPV/OPV        | 4 doses at 2, 4, 6–18 months, 4–6 years                    |
| Hib            | 4 doses at 2, 4, 6, 12–15 months                           |
| MMR            | 2 doses at 12–15 months, 4–6 years                         |
| HBV            | 3 doses at 2, 4, 6–18 months or at birth, 1–2, 6–18 months |
| MenC           | 3 doses at 2, 4, 15–18 months                              |
| PCV7           | 4 doses at 2, 4, 6, 12–18 months                           |
| Var            | 2 doses at 12–18 months, 4–6 years                         |
| HAV‡           | 2 doses at 12 months to 18 years                           |

DTP/DTaP: diphtheria, tetanus, pertussis/ acellular pertussis vaccine; OPV/IPV: live attenuated/inactivated polio vaccine; HBV: hepatitis B vaccine; MMR: measles, mumps, rubella vaccine; Hib: haemophilus influenzae type b vaccine; Men C: conjugated meningococcal C vaccine; PCV7: conjugated pneumococcal 7-valent vaccine; Var: varicella vaccine; HAV: hepatitis A vaccine; ‡ Introduced and fully reimbursed in 2008.
